# Supplementary material for: ATXN2-mediated translation of TNFR1 promotes esophageal squamous cell carcinoma via m6A-dependent manner
Source: PubMed Central journal article supplement (PMC8899599; doi:10.1016/j.ymthe.2022.01.006), 2022-01-04
Supplement: mmc1.pdf [file mmc1.pdf]

**Supplemental Information**

**ATXN2-mediated translation of TNFR1**

**promotes esophageal squamous cell**

**carcinoma via m<sup>6</sup>A-dependent manner**

**Rui Li, Lingxing Zeng, Hongzhe Zhao, Junge Deng, Ling Pan, Shaoping Zhang, Guandi Wu, Ying Ye, Jialiang Zhang, Jiachun Su, Yanfen Zheng, Shuang Deng, Ruihong Bai, Lisha Zhuang, Mei Li, Zhixiang Zuo, Dongxin Lin, Jian Zheng, and Xudong Huang**

# Li et al\_Supplementary Figure 1

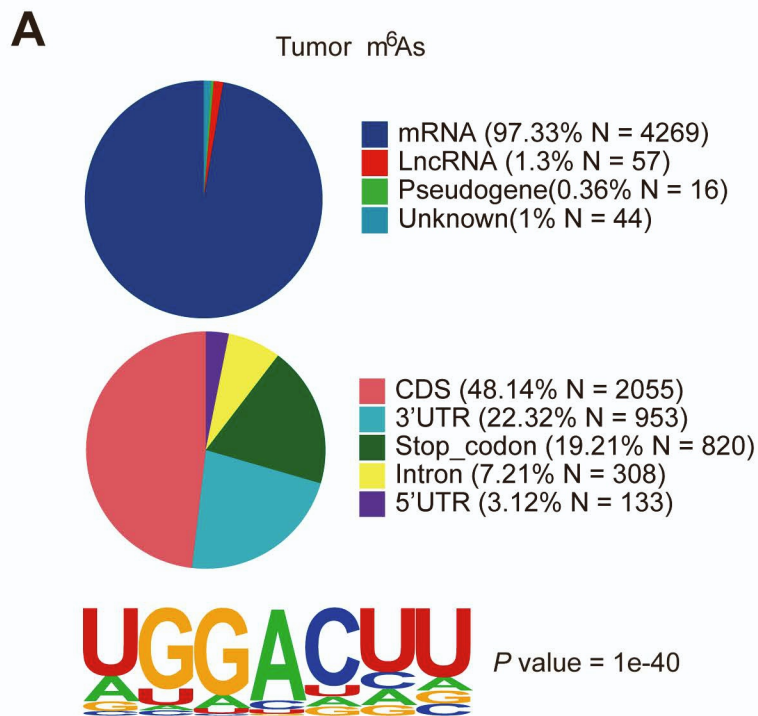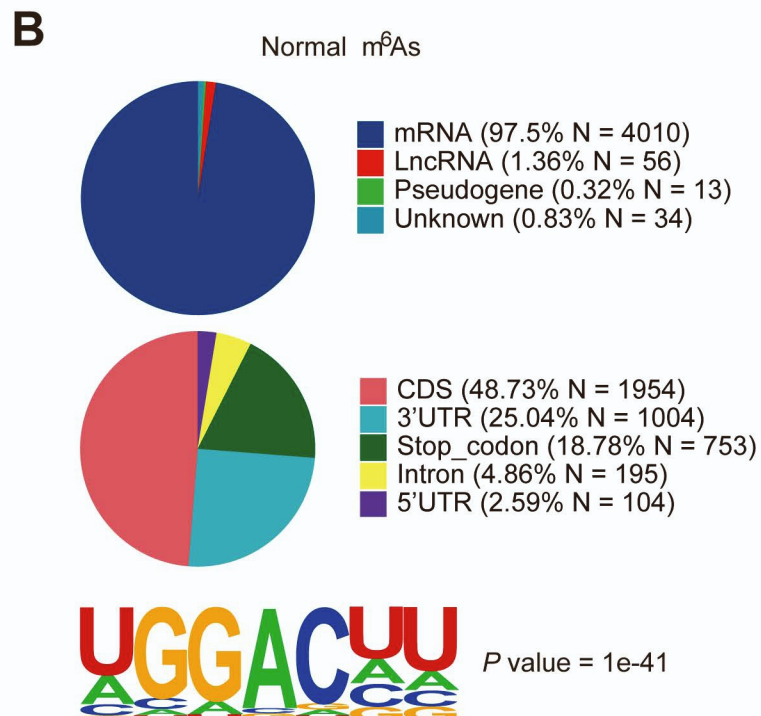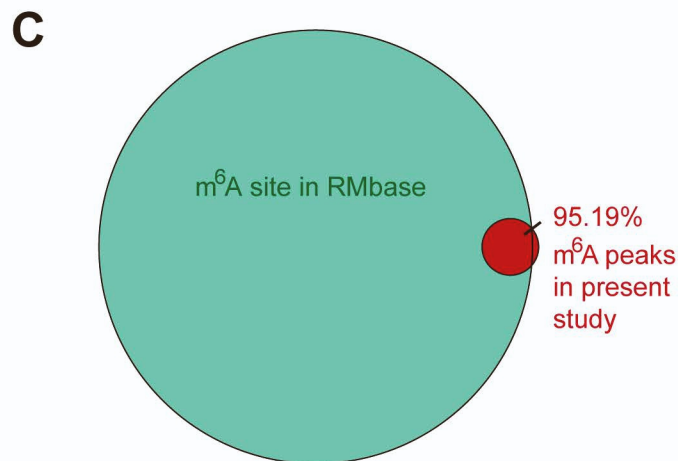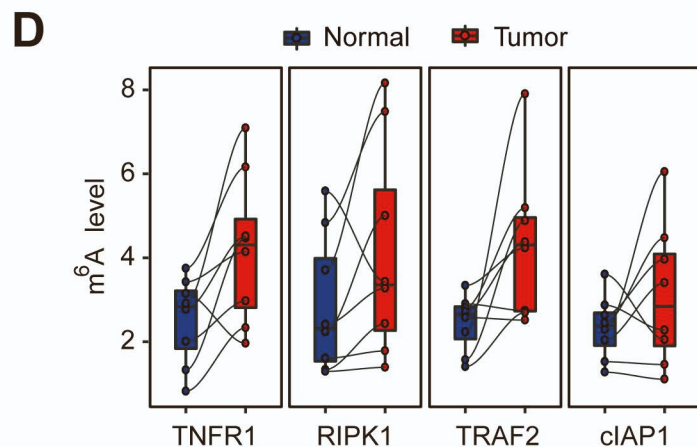

**Figure S1. Distribution of RNA m<sup>6</sup>A modification in human ESCC. Related to Figure 1.**

(A, B) The distribution of annotated m<sup>6</sup>A-modified transcripts in different kinds of RNA (*upper panel*: mRNA, lncRNA, pseudogene and others) and a variety of regions (*middle panel*: 5'UTR, CDS, 3'UTR, stop codon and intron). Sequence logo showing the top rank motif detected by Homer (*lower panel*). (C) The Venn plot shows overlap between the m<sup>6</sup>A peaks in our m<sup>6</sup>A-seq analysis and the m<sup>6</sup>A sites in the RMBase database. (D) The m<sup>6</sup>A modification level of key molecules (TNFR1, RIPK1, TRAF2 and cIAP1) of TNFR1 signaling in 8 ESCC tumors and paired adjacent normal samples according to m<sup>6</sup>A-seq.

# Li et al\_Supplementary Figure 2

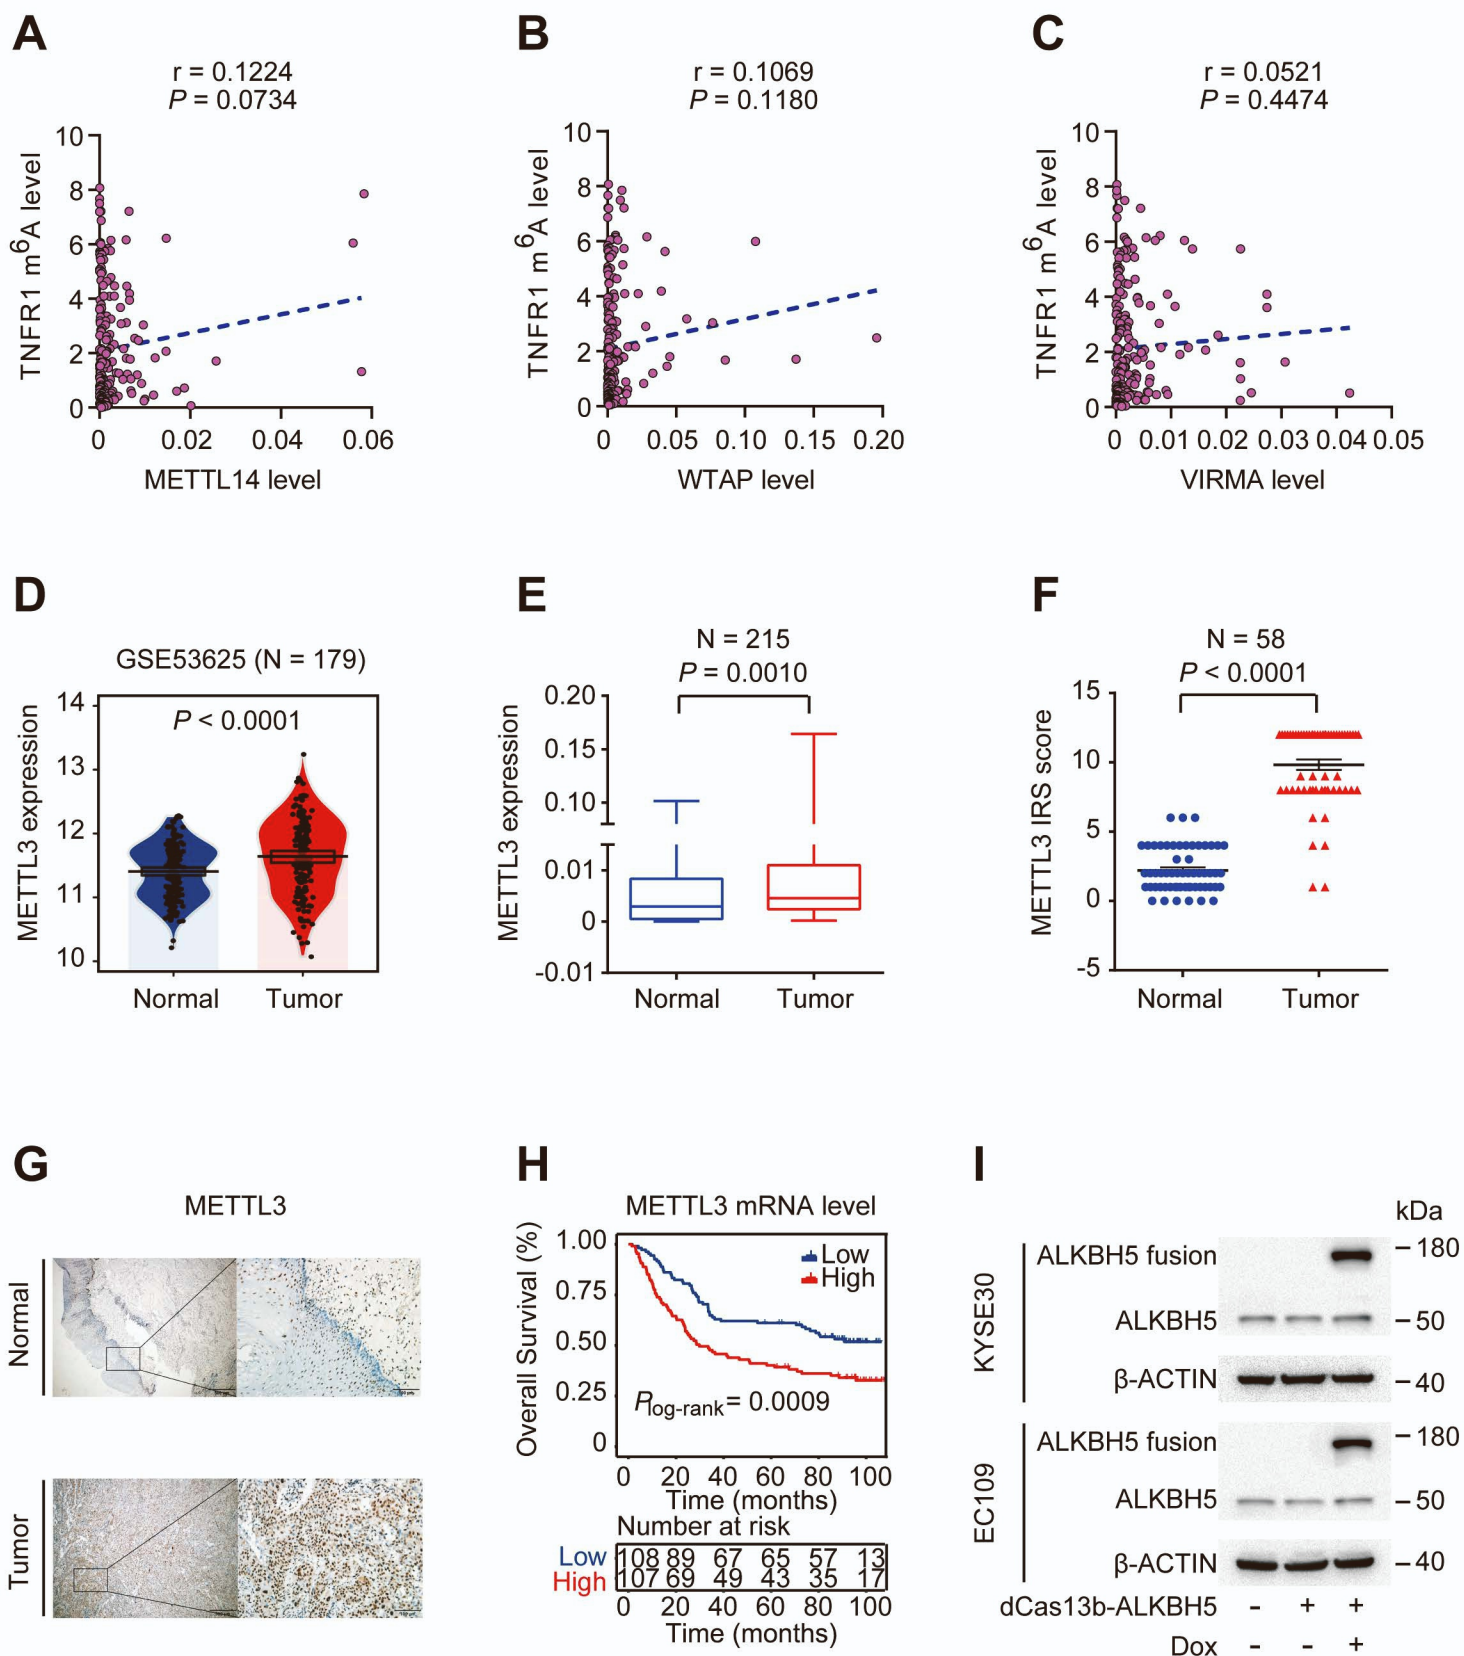

**Figure S2. METTL3 expression is significantly upregulated in ESCC. Related to Figure 2.**

(A-C) Spearman's correlation analysis between TNFR1 m<sup>6</sup>A levels and the mRNA levels of common m<sup>6</sup>A writers (METTL14, A; WTAP, B; VIRMA, C) in ESCC tumor tissues (N = 215). (D) METTL3 mRNA expression in ESCC tumors and paired adjacent normal tissues from a public dataset (GSE53625, N = 179). (E) Expression levels of METTL3 RNA in ESCC samples compared with paired normal tissues (SYSUCC cohort, N = 215). (F, G) Quantification of IHC staining (F, SYSUCC cohort, N = 58) and representative IHC images of METTL3 protein levels in ESCC tumors and paired adjacent normal tissues (G). Scale bar, 500  $\mu$ m (left) and 100  $\mu$ m (right). (H) Kaplan-Meier estimates of survival time of ESCC patients in SYSUCC Cohort (N = 215) by different METTL3 levels, with the adjusted HRs (95% CI) for death of high METTL3 level being 1.840 (1.284–2.635). (I) Western blot showing the expression of the dCas13b-ALKBH5 fusion protein in ESCC cells with or without doxycycline induction. *P* values were calculated by two-sided paired Wilcoxon signed-rank test in (D), (E) and (F), and two-sided log-rank test was used in (H) (\**P* < 0.05, \*\**P* < 0.01 and \*\*\**P* < 0.001).

# Li et al\_Supplementary Figure 3

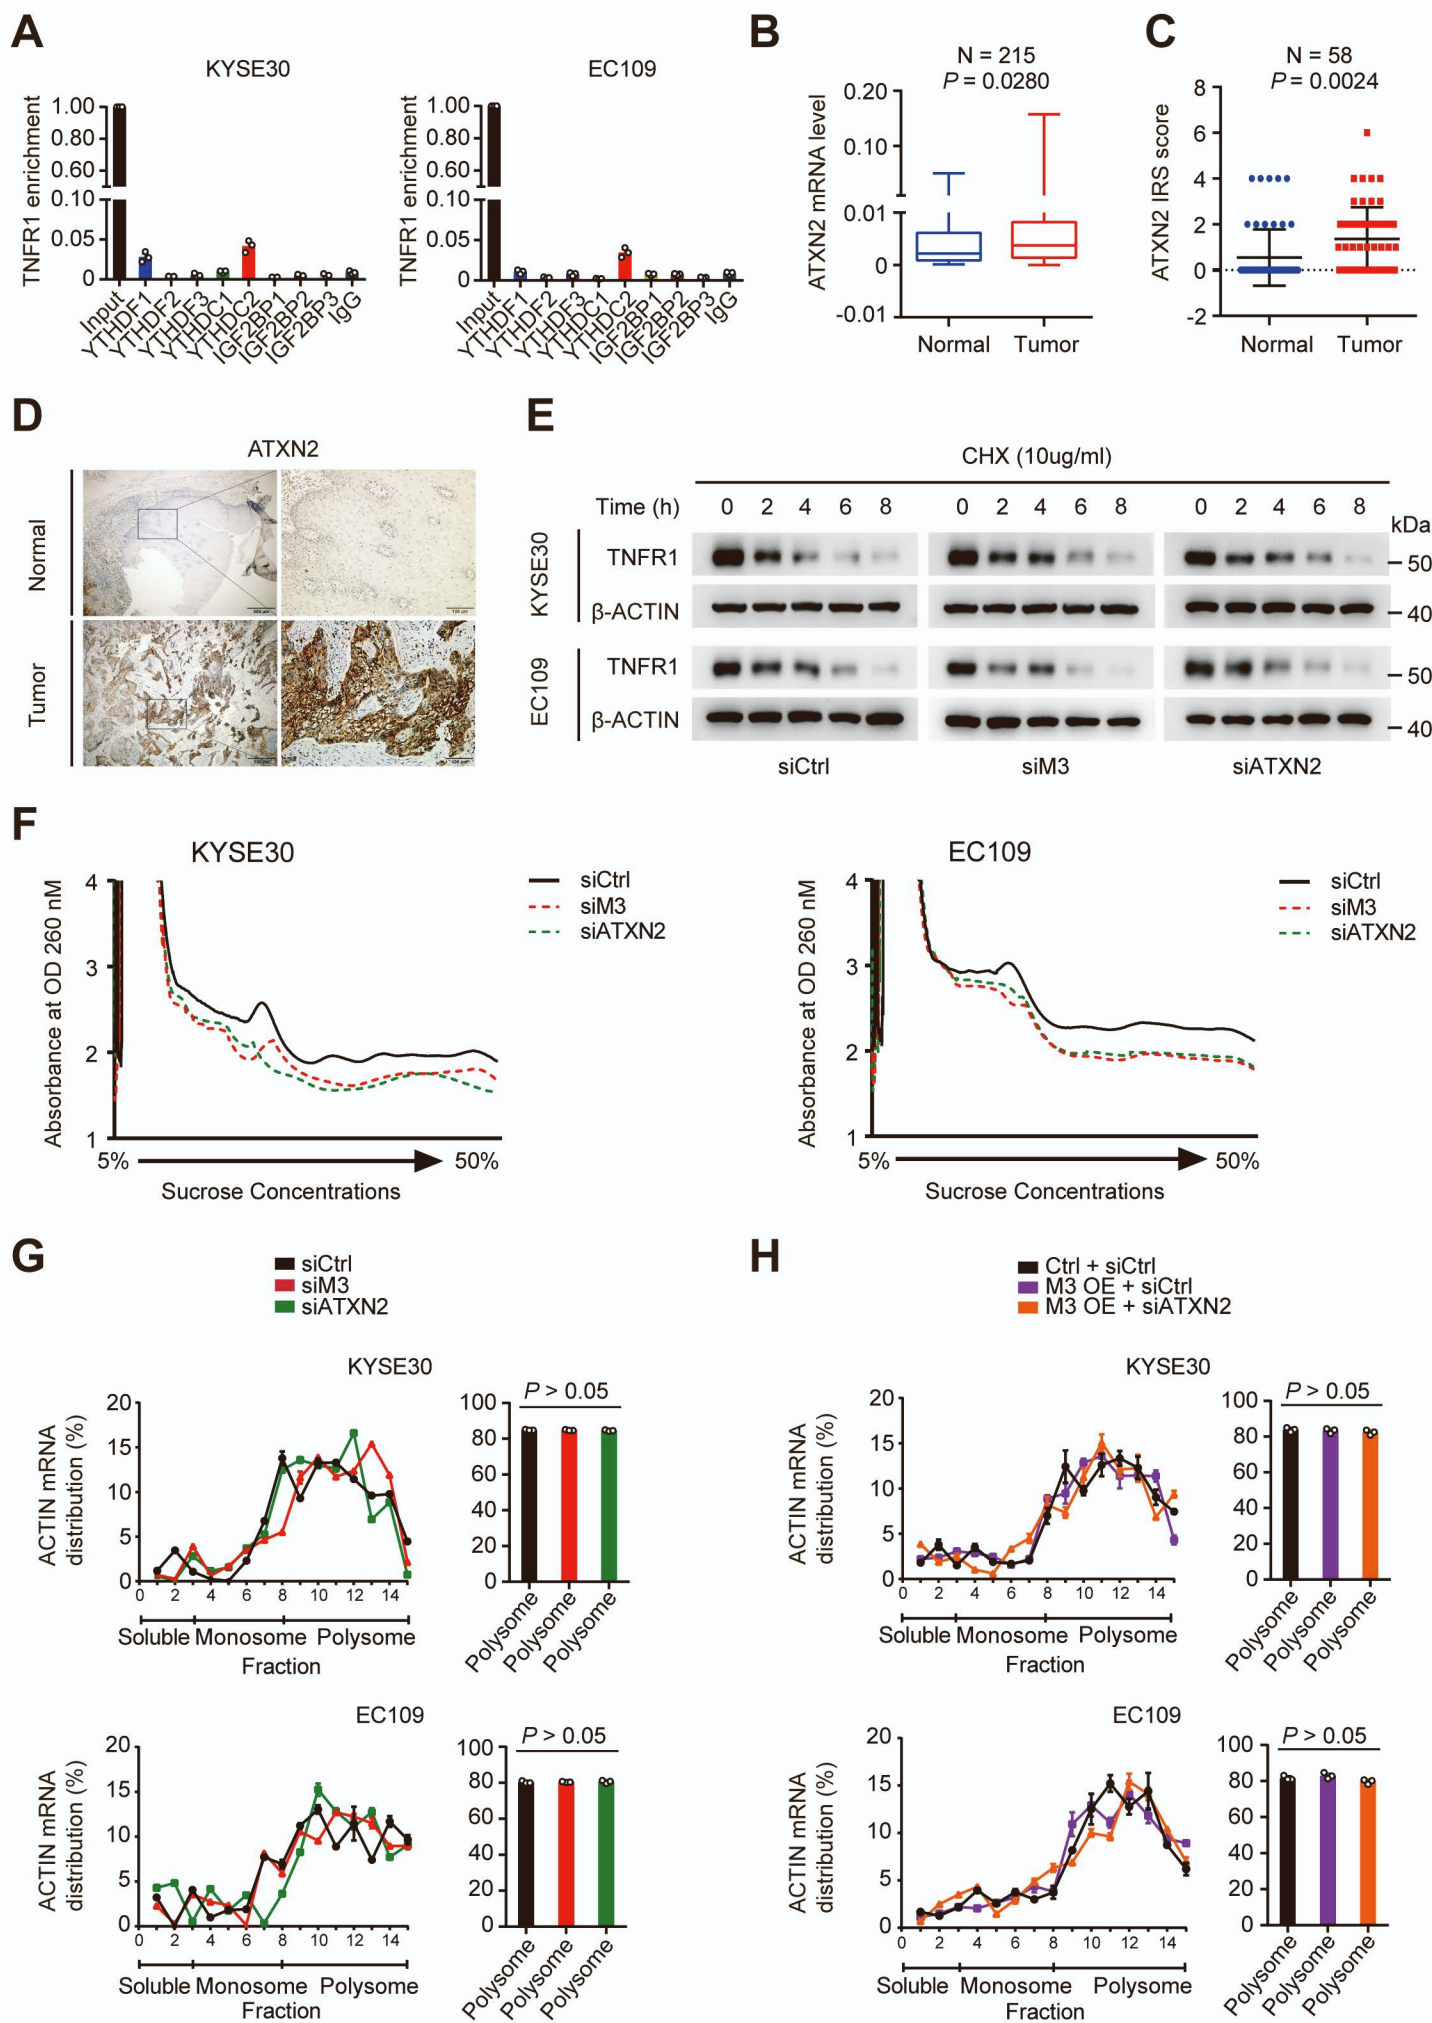

**Figure S3. ATXN2 function as a TNFR1 m<sup>6</sup>A mediator and promotes its translation in ESCC cells. Related to Figure 3.**

(A) Association of common readers (YTHDF1/2/3, YTHDC1/2, IGF2BP1/2/3) with TNFR1 determined by RNA immunoprecipitation (RIP) assays. IgG served as the negative control. (B) mRNA levels of ATXN2 in ESCC samples compared with paired normal tissues (SYSUCC cohort, N = 215). (C, D) Quantification of IHC staining (C, SYSUCC cohort, N = 58) and representative IHC images of ATXN2 protein levels in ESCC tumors and paired adjacent normal tissues (D). Scale bar, 500  $\mu$ m (left) and 100  $\mu$ m (right). (E) ESCC cells with METTL3/ATXN2 knockdown and control cells were treated with cycloheximide (CHX; 10  $\mu$ g/ml) for the indicated periods of time. TNFR1 levels were analyzed by immunoblotting. (F) The polysome profiling of ESCC cells with the indicated treatments. (G) Polysome fraction analysis in cells with the indicated treatments. The level of  $\beta$ -ACTIN mRNA in each gradient fraction was measured by qPCR and plotted as a percentage (G, H). The results of (A, G, H) are from at least 3 experiments, and data in (A, G, H) are mean  $\pm$  SEM. *P*-values were calculated by two-sided Student's *t*-test (*\*P* < 0.05, *\*\*P* < 0.01 and *\*\*\*P* < 0.001) in (G, H). *P* values were calculated by two-sided paired Wilcoxon signed-rank test in (B) and (C).



# Li et al\_Supplementary Figure 4

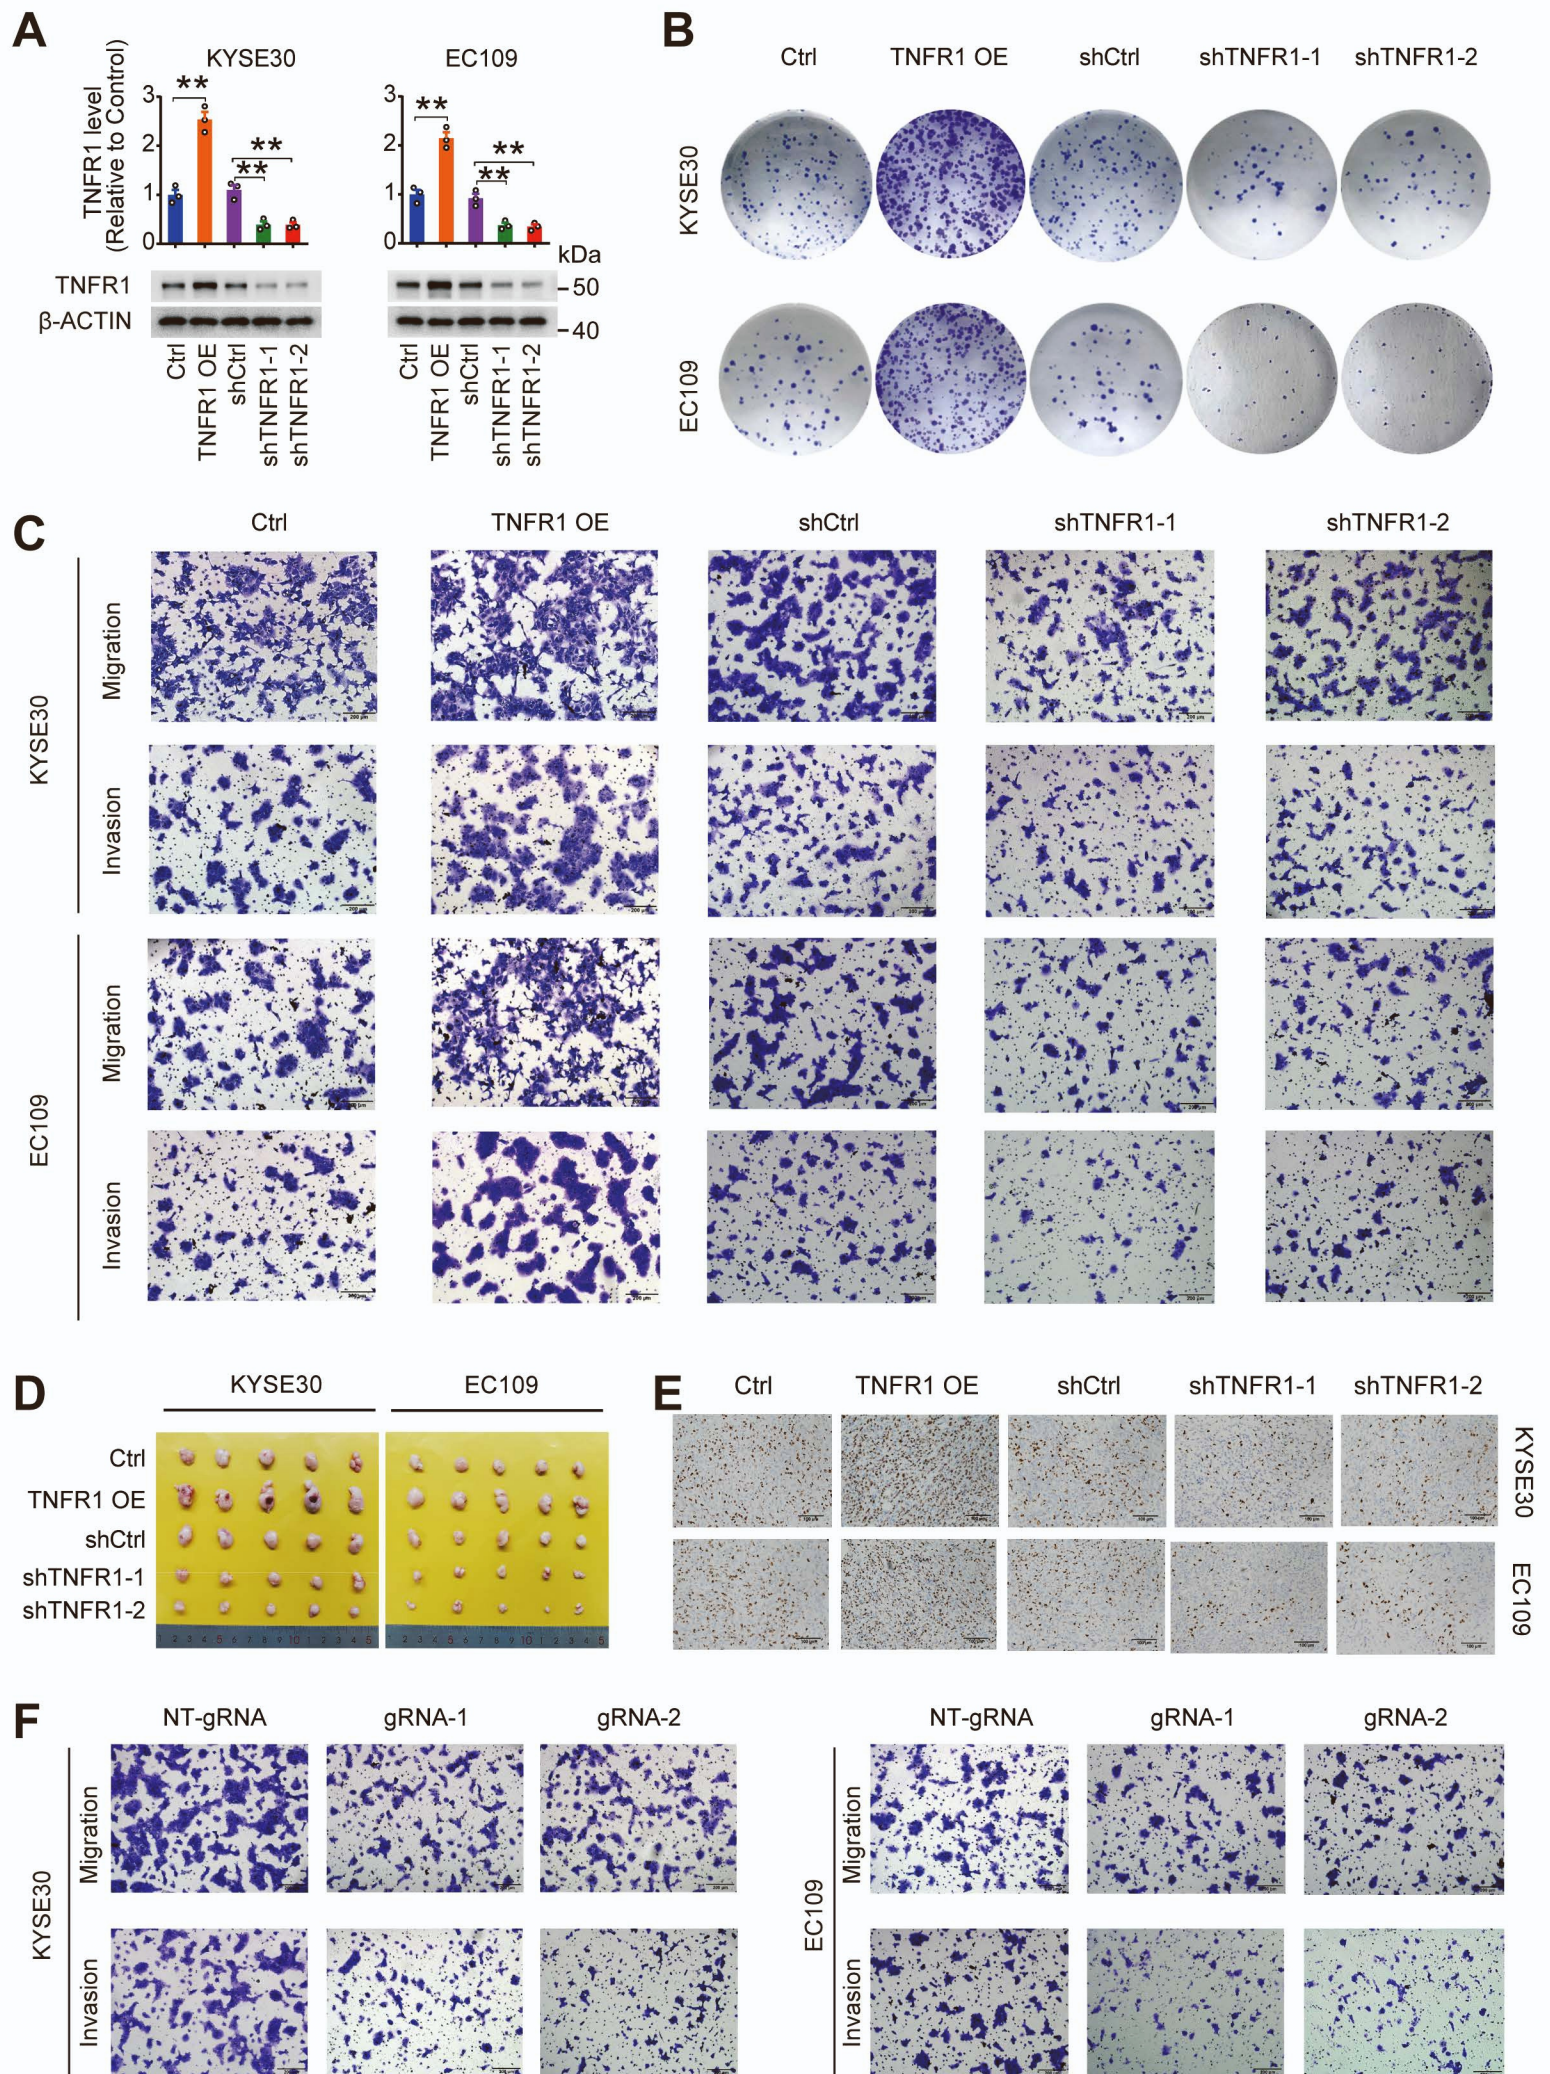



**Figure S4. Effects of TNFR1 on ESCC cell malignant phenotypes. Related to Figure 5.**

(A) Efficiency of TNFR1 overexpression and knockdown in ESCC cells. Data are the mean  $\pm$  SEM from 3 independent experiments; \*\*,  $P < 0.01$ , Student's *t*-test. (B) Colony formation assays were performed to detect the long-term proliferation capacity of KYSE30 and EC109 cells with TNFR1 overexpression or knockdown. (C) Representative images showing the effects of TNFR1 overexpression or knockdown on cell migration and invasion. Scale bars, 200  $\mu$ m. (D) Effects of TNFR1 overexpression or knockdown on subcutaneous ESCC xenograft growth in mice. Images of xenograft tumors. (E) Representative IHC images of Ki67 levels in xenograft tumors from (D). Scale bars, 100  $\mu$ m. (F) Representative pictures showing the effects on cell migration and invasion when removing TNFR1 m<sup>6</sup>A modifications. Scale bars, 200  $\mu$ m. The results of (A) are from at least 3 experiments, and the data of (D, E) are from 5 mice. Data in (A) are mean  $\pm$  SEM. *P* values were calculated by two-sided Student's *t*-test (\* $P < 0.05$ , \*\* $P < 0.01$  and \*\*\* $P < 0.001$ ) in (A).

# Li et al\_Supplementary Figure 5

**A**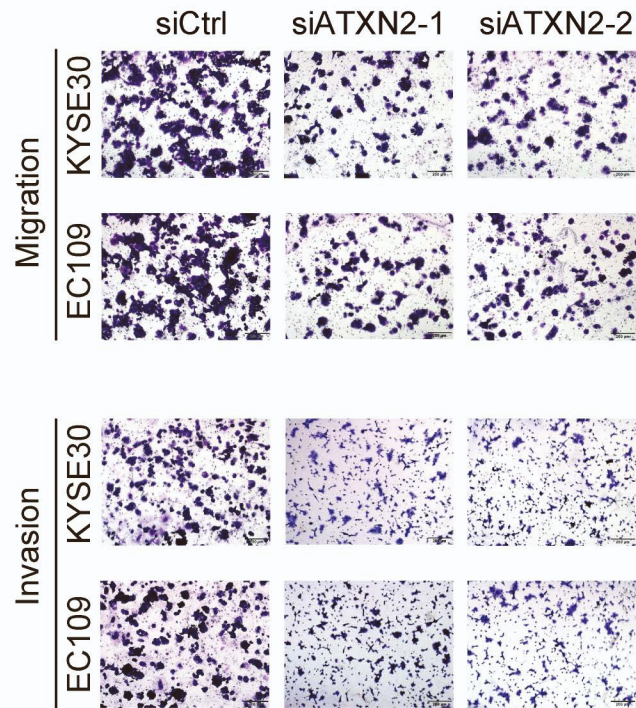**B**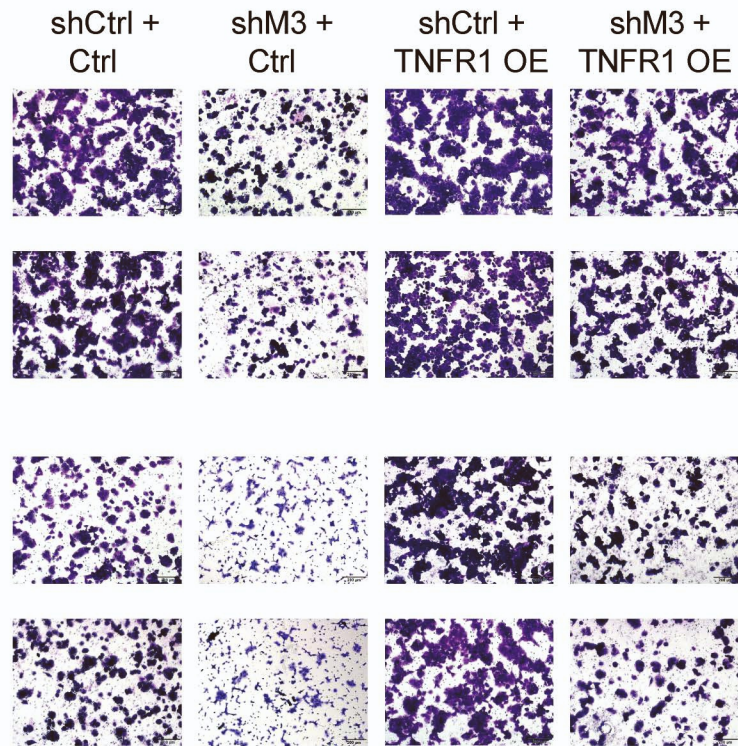**C**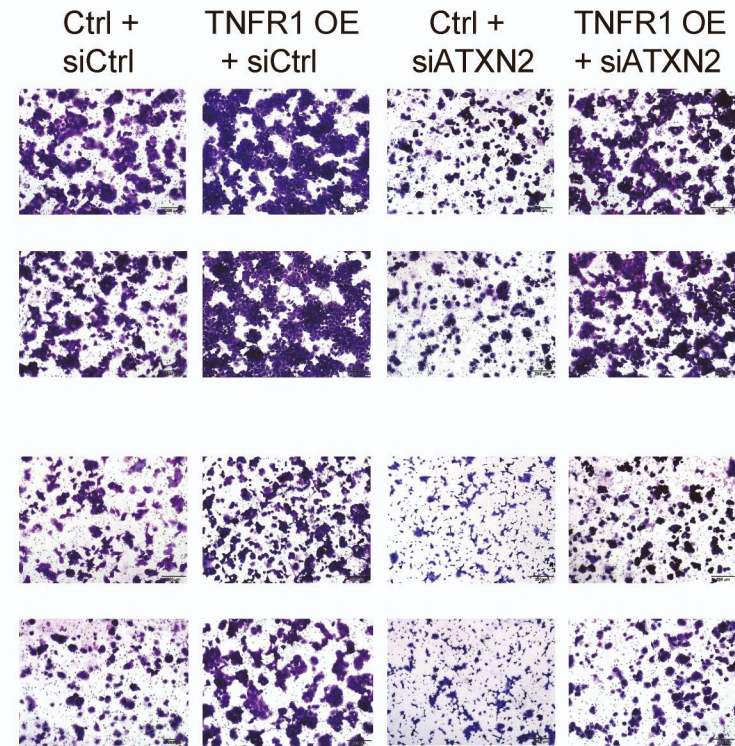

**Figure S5. Effects of ATXN2 knockdown and rescue assays on ESCC malignant phenotypes and MAPK/NF- $\kappa$ B activities. Related to Figure 6.**

(A) Representative images showing the effects of ATXN2 knockdown on cell migration and invasion. (B) Representative images showing the effects of TNFR1 overexpression on cell migration and invasion in cells with METTL3 knockdown (shM3). (C) Representative images showing the effects of ATXN2 depletion on cell migration and invasion in cells with TNFR1 overexpression (TNFR1 OE). Scale bars, 200  $\mu$ m in (A–C).

**Table S1.** Genes involved in TNFR1 related pathways and their m<sup>6</sup>A levels in ESCC.**Table S2.** Baseline and clinical characteristics of patients with ESCC in this study.

| <b>Variable</b>                      | <b>All cases<br/>(N = 215)</b> | <b>Alive<br/>(N = 93)</b> | <b>Deceased<br/>(N = 122)</b> | <b>P value<sup>d</sup></b> |
|--------------------------------------|--------------------------------|---------------------------|-------------------------------|----------------------------|
| Age, mean (S.E.M. <sup>a</sup> )     | 60.09 (0.62)                   | 59.86 (0.88)              | 60.27 (0.87)                  | 0.744                      |
| Sex, N (%)                           |                                |                           |                               | 0.115                      |
| Male                                 | 166 (77.2)                     | 67 (72.0)                 | 99 (81.1)                     |                            |
| Female                               | 49 (22.8)                      | 26 (28.0)                 | 23 (18.9)                     |                            |
| Family history, N (%)                |                                |                           |                               | 0.631                      |
| Yes                                  | 52 (24.2)                      | 21 (22.6)                 | 31 (25.4)                     |                            |
| No                                   | 163 (75.8)                     | 72 (77.4)                 | 91 (74.6)                     |                            |
| Smoking status <sup>b</sup> , N (%)  |                                |                           |                               | 0.351                      |
| Ever                                 | 137 (63.7)                     | 56 (60.2)                 | 81 (66.4)                     |                            |
| Never                                | 78 (36.3)                      | 37 (39.8)                 | 41 (33.6)                     |                            |
| Drinking status <sup>b</sup> , N (%) |                                |                           |                               | 0.460                      |
| Ever                                 | 94 (43.7)                      | 38 (40.9)                 | 56 (45.9)                     |                            |
| Never                                | 121 (56.3)                     | 55 (59.1)                 | 66 (54.1)                     |                            |
| Differentiation, N (%)               |                                |                           |                               | 0.858                      |
| Well                                 | 37 (17.2)                      | 17 (18.3)                 | 20 (16.4)                     |                            |
| Moderate                             | 114 (53.0)                     | 50 (53.8)                 | 64 (52.5)                     |                            |
| Poor                                 | 64 (29.8)                      | 26 (27.9)                 | 38 (31.1)                     |                            |
| Tumor stage <sup>c</sup> , N (%)     |                                |                           |                               | < 0.0001                   |
| I                                    | 13 (6.0)                       | 8 (8.6)                   | 5 (4.1)                       |                            |
| II                                   | 93 (43.3)                      | 54 (58.1)                 | 39 (32.0)                     |                            |
| III                                  | 101 (47.0)                     | 28 (30.1)                 | 73 (59.8)                     |                            |
| IV                                   | 8 (3.7)                        | 3 (3.2)                   | 5 (4.1)                       |                            |
| Treatment, N (%)                     |                                |                           |                               | 0.283                      |
| Surgery Only                         | 203 (94.4)                     | 87 (93.5)                 | 116 (95.1)                    |                            |
| Surgery + Chemotherapy               | 5 (2.3)                        | 3 (3.2)                   | 2 (1.6)                       |                            |
| Surgery + Radiotherapy               | 2 (1.0)                        | 2 (2.2)                   | 0 (0.0)                       |                            |
| Surgery + Chemoradiotherapy          | 5 (2.3)                        | 1 (1.1)                   | 4 (3.3)                       |                            |

<sup>a</sup>) S.E.M., standard error of mean.

<sup>b</sup>) Patients were defined as nonsmokers who smoke an average of <1 cigarette/day and for <1 year during their lifetime; other people were defined as smokers. Patients were classified as drinkers who drink at least twice a week and continuously for at least 1 year in their lifetime; other people were defined as nondrinkers.

<sup>c</sup>) Tumor stage were defined according to the 7th edition of the AJCC Cancer Staging System.

<sup>d</sup>) P value was calculated by two-sided Chi-square test/Fisher's exact test.



**Table S3.** Baseline and clinical characteristics of patients with ESCC used for IHC in this study.

| <b>Variable</b>                      | <b>All cases<br/>(N = 58)</b> | <b>Alive<br/>(N = 24)</b> | <b>Deceased<br/>(N = 34)</b> | <b>P value<sup>d</sup></b> |
|--------------------------------------|-------------------------------|---------------------------|------------------------------|----------------------------|
| Age, mean (S.E.M. <sup>a</sup> )     | 62.24 (1.14)                  | 62.17 (1.44)              | 62.29 (1.68)                 | 0.957                      |
| Sex, N (%)                           |                               |                           |                              | 0.313                      |
| Male                                 | 46 (79.3)                     | 17 (70.8)                 | 29 (85.3)                    |                            |
| Female                               | 12 (20.7)                     | 7 (29.2)                  | 5 (14.7)                     |                            |
| Family history, N (%)                |                               |                           |                              | 1.000                      |
| Yes                                  | 13 (22.4)                     | 5 (20.8)                  | 8 (23.5)                     |                            |
| No                                   | 45 (77.6)                     | 19 (79.2)                 | 26 (76.5)                    |                            |
| Smoking status <sup>b</sup> , N (%)  |                               |                           |                              | 0.352                      |
| Ever                                 | 39 (67.2)                     | 14 (58.3)                 | 25 (73.5)                    |                            |
| Never                                | 19 (32.8)                     | 10 (41.7)                 | 9 (26.5)                     |                            |
| Drinking status <sup>b</sup> , N (%) |                               |                           |                              | 1.000                      |
| Ever                                 | 26 (44.8)                     | 11 (45.8)                 | 15 (44.1)                    |                            |
| Never                                | 32 (55.2)                     | 13 (54.2)                 | 19 (55.9)                    |                            |
| Differentiation, N (%)               |                               |                           |                              | 0.934                      |
| Well                                 | 14 (24.1)                     | 6 (25.0)                  | 8 (23.5)                     |                            |
| Moderate                             | 28 (48.3)                     | 12 (50.0)                 | 16 (47.1)                    |                            |
| Poor                                 | 16 (27.6)                     | 6 (25.0)                  | 10 (29.4)                    |                            |
| Tumor stage <sup>c</sup> , N (%)     |                               |                           |                              | 0.224                      |
| I                                    | 3 (5.2)                       | 2 (8.3)                   | 1 (2.9)                      |                            |
| II                                   | 22 (38.0)                     | 12 (50.0)                 | 10 (29.4)                    |                            |
| III                                  | 31 (53.4)                     | 9 (37.5)                  | 22 (64.8)                    |                            |
| IV                                   | 2 (3.4)                       | 1 (4.2)                   | 1 (2.9)                      |                            |

<sup>a</sup>) S.E.M., standard error of mean.

<sup>b</sup>) Patients were defined as nonsmokers who smoke an average of <1 cigarette/day and for <1 year during their lifetime; other people were defined as smokers. Patients were classified as drinkers who drink at least twice a week and continuously for at least 1 year in their lifetime; other people were defined as nondrinkers.

<sup>c</sup>) Tumor stage were defined according to the 7th edition of the AJCC Cancer Staging System.

<sup>d</sup>) P value was calculated by two-sided Chi-square test/Fisher's exact test.

**Table S4.** Proteins identified in RNA pulldown and mass spectrometry analysis with TNFR1[m<sup>6</sup>A] or TNFR1[A]

**Table S5.** Characteristics of ESCC patients for m<sup>6</sup>A-seq in this study.

| Sample ID | Gender | Age | Differentiation | Smoking status <sup>a</sup> | Drinking status <sup>b</sup> | Family history | Tumor stage <sup>c</sup> |
|-----------|--------|-----|-----------------|-----------------------------|------------------------------|----------------|--------------------------|
| 320069    | Male   | 53  | Poor            | Smoker                      | Nondrinker                   | No             | III                      |
| 318599    | Male   | 53  | Moderate        | Smoker                      | Drinker                      | Yes            | III                      |
| 322954    | Male   | 68  | Moderate        | Smoker                      | Drinker                      | No             | III                      |
| 320754    | Male   | 59  | Poor            | Smoker                      | Nondrinker                   | No             | III                      |
| 349968    | Male   | 61  | Moderate        | Smoker                      | Drinker                      | No             | III                      |
| 345487    | Female | 65  | Poor            | Nonsmoker                   | Nondrinker                   | No             | III                      |
| 350991    | Male   | 62  | Moderate        | Nonsmoker                   | Drinker                      | Yes            | II                       |
| 335239    | Male   | 53  | Moderate        | Smoker                      | Nondrinker                   | No             | III                      |

<sup>a)</sup> Patients were defined as nonsmokers who smoke an average of <1 cigarette/day and for <1 year during their lifetime; other people were defined as smokers.

<sup>b)</sup> Patients were classified as drinkers who drink at least twice a week and continuously for at least 1 year in their lifetime; other people were defined as nondrinkers.

<sup>c)</sup> Tumor stage were defined according to the 7th edition of the AJCC Cancer Staging System.

**Table S6.** Primers, oligonucleotides and sgRNAs used in this study.

| <b>qRT-PCR</b>                     | Primer sequence (5' → 3')                      |
|------------------------------------|------------------------------------------------|
| METTL3-Forward                     | GTGACTATGGAACCAAGGAGGAG                        |
| METTL3-Reverse                     | TAAGGAAAGAGCAGTCACCTAAAGA                      |
| METTL14-Forward                    | TGCAGCACCTCGATCATTTATTT                        |
| METTL14-Reverse                    | AAGTCTTAGTCTTCCCAGGATTGTT                      |
| WTAP-Forward                       | GCCCAACTGAGATCAACAATGG                         |
| WTAP-Reverse                       | TGGCTATCAGGCGTAAACTTCC                         |
| VIRMA-Forward                      | TCCCAACGATGGCACGAAT                            |
| VIRMA-Reverse                      | TTGCAGCACACCAGGGTGAGC                          |
| TNFR1-Forward                      | AACGGTGGAAAGTCCAAGCTCTAC                       |
| TNFR1-Reverse                      | AAGGTGGAAGTGGGCACGGGA                          |
| ATXN2-Forward                      | CCTTCAATACTTAGTAACACGGAGCA                     |
| ATXN2-Reverse                      | CATTGGGATTCAATGTTGATTTCTAA                     |
| β-ACTIN-Forward                    | ACAGAGCCTCGCCTTTGCCGAT                         |
| β-ACTIN-Reverse                    | CTTGACATGCCGGAGCCGTT                           |
| <b>m<sup>6</sup>A-RIP-qPCR</b>     | Primer sequence (5' → 3')                      |
| TNFR1-Forward                      | TGCCTGGACAAGCACATAGCAAG                        |
| TNFR1-Reverse                      | GTGTATGTACAAAAGTCCACAGCTCC                     |
| <b>PAR-CLIP-qPCR</b>               | Primer sequence (5' → 3')                      |
| TNFR1-Forward                      | TGCCTGGACAAGCACATAGCAAG                        |
| TNFR1-Reverse                      | GTGTATGTACAAAAGTCCACAGCTCC                     |
| <b>Select qPCR</b>                 |                                                |
| TNFR1-select up oligonucleotides   | tagccagtaccgtagtgcgtgTTGCTATGTGCTTG            |
| TNFR1-select down oligonucleotides | 5phos/CCAGGCAGAGGGCACAGGAGcagaggctgagtcgctgcat |
| qPCR up primer                     | ATGCAGCGACTCAGCCTCTG                           |
| qPCR down primer                   | TAGCCAGTACCGTAGTGCGTG                          |
| <b>dCas13b-ALKBH5</b>              |                                                |
| sgRNA-1                            | AAAACAAAACAAAACAAAACAAAAAA<br>AACTGCTTATGCA    |
| sgRNA-2                            | CTGTGAAAAAGGCTCAGGGACGAACCAG<br>GGGCCCCCGAGC   |

**Table S7.** Sequences of shRNAs or siRNAs and probes used in this study.

| <b>shRNA or siRNA</b>                  | <b>Sequence (5' → 3')</b>                                                    |
|----------------------------------------|------------------------------------------------------------------------------|
| shControl                              | TTCTCCGAACGTGTCACGT                                                          |
| shMETTL3-1                             | GGAGATCCTAGAGCTATTA                                                          |
| shMETTL3-2                             | GCACATCCTACTCTTGTA                                                           |
| shTNFR1-1                              | GCCATGCAGGTTTCTTTCTAA                                                        |
| shTNFR1-2                              | CATTGGTTTAATGTATCGCTA                                                        |
| siControl                              | UUCUCCGAACGUGUCACGUTT                                                        |
| siATXN2-1                              | GCCCAUGCCAGUGAAUCAATT                                                        |
| siATXN2-2                              | CCAGCUUACUCCACGCAAUTT                                                        |
| siMETTL3                               | GGAGAUCUAGAGCUAUUATT                                                         |
| <b>Probe for RNA pulldown and EMSA</b> | <b>Sequence (5' → 3')</b>                                                    |
| TNFR1[A]                               | ACUUGGCACUCCUGUGCCCUCUGCC<br>UGGA[A]CAAGCACAUAGCAAGCUG<br>AAC                |
| TNFR1[m <sup>6</sup> A]                | ACUUGGCACUCCUGUGCCCUCUGCC<br>UGGA[m <sup>6</sup> A]CAAGCACAUAGCAAGCU<br>GAAC |



**Table S8.** Antibodies utilized in this study.

| <b>Antibody</b>              | <b>Application</b> | <b>Source</b>             | <b>Catalog number</b> |
|------------------------------|--------------------|---------------------------|-----------------------|
| Rabbit anti-METTL3           | WB, IHC            | Abcam                     | ab195352              |
| Rabbit anti-TNFR1            | WB                 | Cell Signaling Technology | 3736                  |
| Rabbit anti-Ki67             | IHC                | ZSGB-BIO                  | ZA-0502               |
| Rabbit anti-YTHDF1           | RIP                | Abcam                     | ab220162              |
| Rabbit anti-YTHDF2           | RIP                | Abcam                     | ab220163              |
| Rabbit anti-YTHDF3           | RIP                | Abcam                     | ab220161              |
| Rabbit anti-YTHDC1           | RIP                | Cell Signaling Technology | 81504                 |
| Rabbit anti-YTHDC2           | RIP                | Cell Signaling Technology | 46324                 |
| Rabbit anti-IGF2BP1          | RIP                | Abcam                     | ab184305              |
| Mouse anti-IGF2BP2           | RIP                | Abcam                     | ab128175              |
| Rabbit anti-IGF2BP3          | RIP                | Abcam                     | ab177477              |
| Rabbit anti-ATXN2            | WB, RIP, CLIP      | Proteintech               | 21776-1-AP            |
| Rabbit anti-THRAP3           | WB, RIP            | Invitrogen                | A300-956A             |
| Rabbit anti-CCT5             | WB, RIP            | Invitrogen                | PA5-22093             |
| Rabbit anti-MTREX            | WB, RIP            | Abcam                     | ab70551               |
| Rabbit anti-p65              | WB                 | Cell Signaling Technology | 8242                  |
| Rabbit anti-phospho p65      | WB                 | Cell Signaling Technology | 3033                  |
| Rabbit anti-ERK1/2           | WB                 | Abcam                     | ab17942               |
| Rabbit anti-phospho ERK1/2   | WB                 | Abcam                     | ab76299               |
| Rabbit anti-p38              | WB                 | Cell Signaling Technology | 8690                  |
| Rabbit anti-phospho p38      | WB                 | Cell Signaling Technology | 4511                  |
| Mouse anti-6-methyladenosine | RIP                | Synaptic Systems          | 202003                |
| Rabbit anti-ALKBH5           | WB                 | Merckmillipore            | ABE547                |
| Mouse anti-ACTIN             | WB                 | Proteintech               | 66009-1-Ig            |
